# Supplementary material for: Layer-dependent friction on the surface of alternately stacked graphene and h-BN
Source: Royal Society of Chemistry journal article supplement (doi:10.1039/d5cp03937a), 2025-11-12
Supplement: d5cp03937a1.pdf [file d5cp03937a1.pdf]

SUPPORTING INFORMATION

**Layer-Dependent Friction on the Surface of Multilayer Alternately  
Stacked Graphene and h-BN**

Hao Wang, Lu Chen, Yunxiao Wang, Yongteng Wei, Junqin Shi, Tengfei Cao, Xiaoli Fan\*

State Key Laboratory of Solidification Processing, Center for Advanced Lubrication and Seal  
Materials, School of Material Science and Engineering, Northwestern Polytechnical University,

Xi'an, Shaanxi 710072, China

\*Corresponding author: [xlfan@nwpu.edu.cn](mailto:xlfan@nwpu.edu.cn)

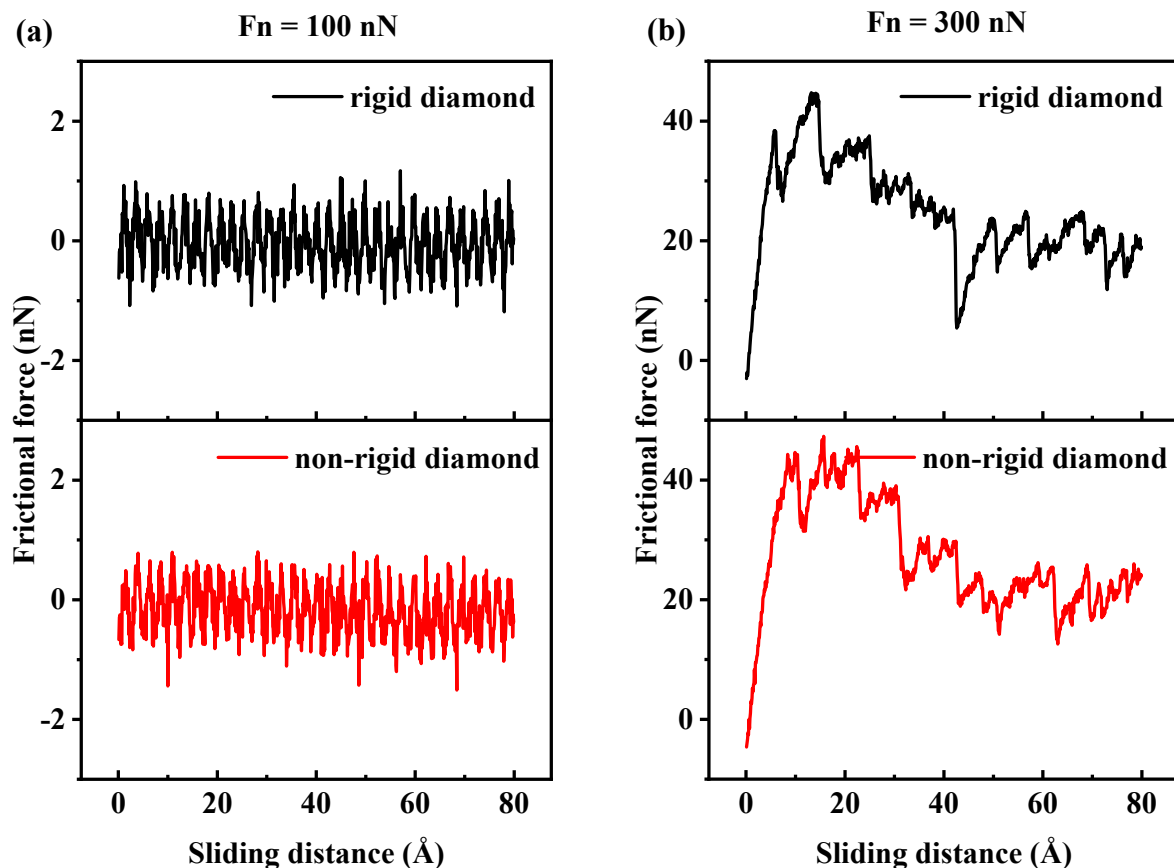

**Figure S1.** The comparison of the friction force on the surfaces of bilayer alternately stacked graphene and hexagonal boron nitride with graphene as the surface (2GBN\_G) under sliding contact with rigid and non-rigid diamond tip at normal loads of (a) 100 nN and (b) 300 nN .

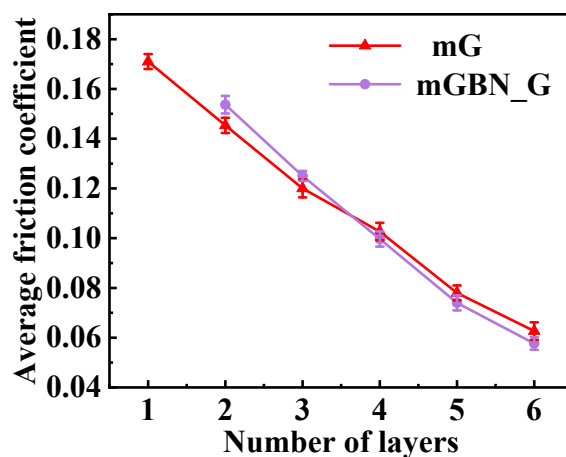

**Figure S2.** The variation of the average friction coefficients on mG and mGBN\_G with the layer numbers from 1 to 6. Error bars (representing standard deviation,  $n = 3$ ) indicate the statistical significance.

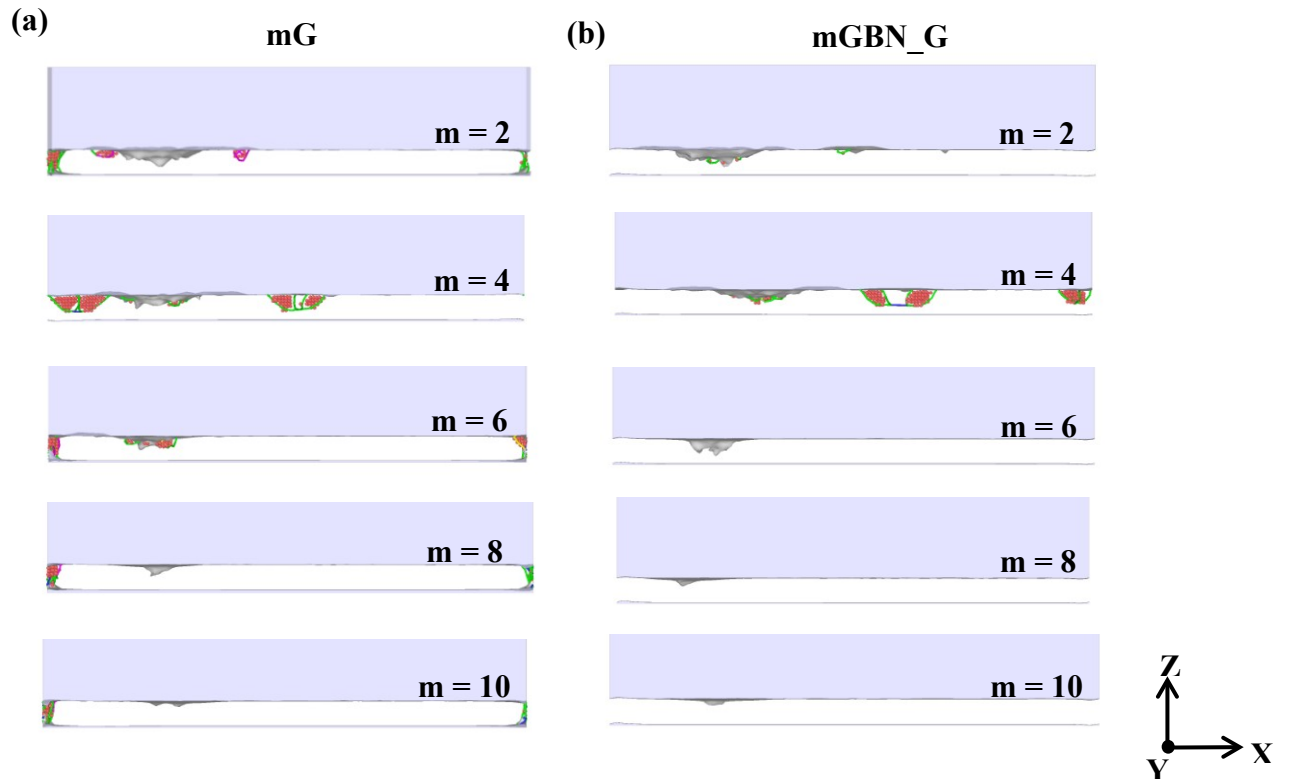

**Figure S3.** The dislocation snapshots for (a) multilayer graphene (mG,  $m = 2, 4, 6, 8, 10$ ) and (b) multilayer alternately stacked graphene and hexagonal boron nitride with graphene as the surface (mGBN\_G,  $m = 2, 4, 6, 8, 10$ ) under 300 nN load.

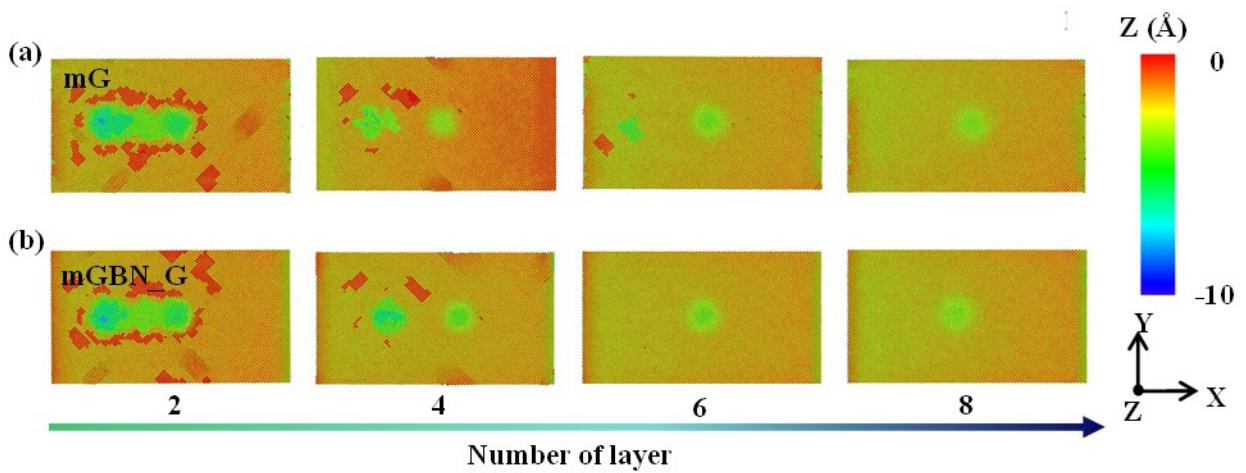

**Figure S4.** Surface wear conditions of copper substrate coated with (a) multilayer graphene (mG,  $m = 2, 4, 6, 8$ ) and (b) multilayer alternately stacked graphene and hexagonal boron nitride with

graphene as the surface (mGBN\_G,  $m = 2, 4, 6, 8$ ) after friction by a diamond tip under a 300 nN normal load. Atoms are colored based on the value of the Z - coordinate.

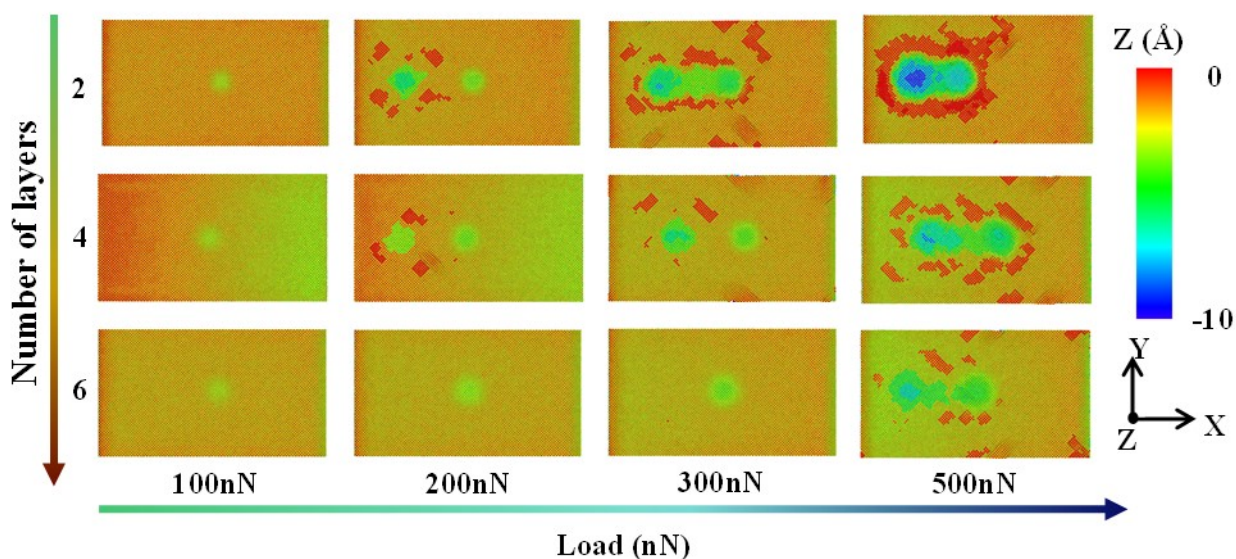

**Figure S5.** Surface wear conditions of copper substrate coated with multilayer alternately stacked graphene and hexagonal boron nitride with graphene as the surface (mGBN\_G,  $m = 2, 4, 6$ ) after friction by a diamond tip under 100 nN, 200 nN, 300 nN and 500 nN normal loads. Atoms are colored based on the value of the Z - coordinate.
